# Supplementary material
Source: publisher figshare collection journal article supplement (https://acs.figshare.com/ndownloader/files/4159825)
Supplement: Supplementary file 1 [file 4159825]

**Table 2: Summary of data for the intertidal and sub-tidal cores from the Severn Estuary**

|                                                                                                     | Sub-tidal laminated sediment |                      |                     |                     |                     | Salt marsh                |                           |
|-----------------------------------------------------------------------------------------------------|------------------------------|----------------------|---------------------|---------------------|---------------------|---------------------------|---------------------------|
|                                                                                                     | NPD3                         | NPD4                 | NPD7                | NPD8                | NPD10               | PET 1                     | PET 2                     |
| Core collected                                                                                      | Nov 2002                     | Nov 2002             | Nov 2002            | Nov 2002            | Nov 2002            | Jul 2001                  | Oct 2003                  |
| Core location                                                                                       | Bottom of the N Deep         | Bottom of the N Deep | Flank of the N Deep | Flank of the N Deep | Flank of the N Deep | Peterstone<br>Upper marsh | Peterstone<br>Upper marsh |
| Water depth (m) to sediment (at lowest astronomical tide)                                           | 10                           | 11                   | 8.5                 | 4.5                 | 6                   | na                        | na                        |
| Core length (m)                                                                                     | 0.53                         | 0.72                 | 1.12                | 1.15                | 0.44                | 0.40                      | 0.45                      |
| Depth to Dec 1981 storm layer                                                                       | 29-30                        | 36-38                | 24-26               | 9-10                | 28-30               | No data                   | No data                   |
| Depth of geochemical step                                                                           | 30                           | 35                   | 23                  | 8                   | 29                  | Not seen                  | Not seen                  |
| Sediment accumulation above the 1982 storm layer ( $\pm 1$ cm)                                      | 29                           | 35                   | 23                  | 9                   | 28                  | No data                   | No data                   |
| Depth where $^{137}\text{Cs}$ goes to zero                                                          | Not seen                     | Not seen             | 26                  | 11                  | 35                  | Not seen                  | Not seen                  |
| Depth of first environmental appearance of OBT in 1982                                              | No data-                     | No data              | 24                  | 10                  | 29                  | 27                        | No data                   |
| SAR based on accumulation since 1982 storm layer position cm/y                                      | 1.4                          | 1.7                  | 1.1                 | 0.4                 | 1.4                 | Effect not seen           | Effect not seen           |
| SAR based on $^{210}\text{Pb}$ (cm/y)                                                               | 1.3                          | No data              | 1.1                 | 0.4                 | 1.3                 | No data                   | No data                   |
| SAR based on $^3\text{H}$                                                                           | ?                            | ?                    | 0.9.                | 0.5                 | 1.2                 | 1.5                       | 2.5                       |
| SAR based on $^{137}\text{Cs}$                                                                      | ?                            | ?                    | ?                   | ?                   | ?                   | 1.25                      |                           |
| Minimum estimated eroded sediment (years equivalent) based on $^{210}\text{Pb}_{\text{xs}}$ profile | $\geq 35$                    | Not clear            | $\geq 25$           | $\geq 10$           | $\geq 25$           | No evidence               | No evidence               |
